# Supplementary material for: Evidence of Community-Wide Spread of Multi-Drug Resistant Escherichia coli in Young Children in Lusaka and Ndola Districts, Zambia
Source: MDPI journal article supplement (doi:10.3390/microorganisms10081684), 2022-08-21
Supplement: s1 [file s1]

### Supplementary 3. Antimicrobial resistant- E. coli patterns in healthy children

Healthy (N=455)

| Resistance patterns | MDR | XDR | PDR | N* of isolates | %Isolates |
|---------------------|-----|-----|-----|----------------|-----------|
|                     |     |     |     | 21             | 4.6       |
| IPM                 |     |     |     | 9              | 2.0       |
| SXT                 |     |     |     | 1              | 0.2       |
| TCY                 |     |     |     | 4              | 0.9       |
| GEN                 |     |     |     | 2              | 0.4       |
| CIP                 |     |     |     | 1              | 0.2       |
| CTX                 |     |     |     | 4              | 0.9       |
| SXT IPM             |     |     |     | 6              | 1.3       |
| TCY IPM             |     |     |     | 2              | 0.4       |
| TCY SXT             |     |     |     | 3              | 0.7       |
| GEN IPM             |     |     |     | 3              | 0.7       |
| CIP IPM             |     |     |     | 1              | 0.2       |
| CIP NAL             |     |     |     | 1              | 0.2       |
| CTX IPM             |     |     |     | 4              | 0.9       |
| CTX NAL             |     |     |     | 1              | 0.2       |
| AMP IPM             |     |     |     | 6              | 1.3       |
| AMP SXT             |     |     |     | 4              | 0.9       |
| AMP TCY             |     |     |     | 1              | 0.2       |
| AMP CTX             |     |     |     | 2              | 0.4       |
| AMC IPM             |     |     |     | 3              | 0.7       |
| CTX CIP NAL         |     |     |     | 1              | 0.2       |
| CTX GEN NAL         | MDR |     |     | 1              | 0.2       |
| AMP SXT IPM         | MDR |     |     | 13             | 2.9       |
| AMP TCY IPM         | MDR |     |     | 4              | 0.9       |
| AMP TCY SXT         | MDR |     |     | 17             | 3.7       |
| AMP NAL TCY         | MDR |     |     | 1              | 0.2       |
| AMP GEN SXT         | MDR |     |     | 1              | 0.2       |
| AMP CIP IPM         | MDR |     |     | 2              | 0.4       |
| AMP CIP SXT         | MDR |     |     | 1              | 0.2       |
| AMP CTX IPM         | MDR |     |     | 1              | 0.2       |
| AMP CTX SXT         | MDR |     |     | 1              | 0.2       |
| AMP CTX CIP         | MDR |     |     | 1              | 0.2       |
| AMC AMP IPM         | MDR |     |     | 1              | 0.2       |
| AMC AMP SXT         | MDR |     |     | 3              | 0.7       |
| AMC AMP TCY         | MDR |     |     | 3              | 0.7       |
| AMC AMP CTX         | MDR |     |     | 5              | 1.1       |
| AMP NAL SXT IPM     | MDR |     |     | 1              | 0.2       |
| AMP NAL TCY SXT     | MDR |     |     | 1              | 0.2       |
| AMP CIP NAL SXT     | MDR |     |     | 1              | 0.2       |
| AMP CHL NAL TCY     | MDR |     |     | 1              | 0.2       |
| AMP CTX NAL IPM     | MDR |     |     | 1              | 0.2       |
| AMP CTX NAL SXT     | MDR |     |     | 2              | 0.4       |
| AMP CTX NAL TCY     | MDR |     |     | 1              | 0.2       |
| AMC AMP NAL SXT     | MDR |     |     | 1              | 0.2       |
| TCY SXT IPM         | MDR |     |     | 3              | 0.7       |
| CIP TCY IPM         | MDR |     |     | 1              | 0.2       |

|                     |     |    |     |
|---------------------|-----|----|-----|
| CIP TCY SXT         | MDR | 1  | 0.2 |
| CTX SXT IPM         | MDR | 1  | 0.2 |
| CTX CIP IPM         | MDR | 1  | 0.2 |
| CTX CIP SXT         | MDR | 1  | 0.2 |
| CTX CIP TCY         | MDR | 1  | 0.2 |
| CTX CHL IPM         | MDR | 1  | 0.2 |
| GEN TCY SXT IPM     | MDR | 1  | 0.2 |
| CIP TCY SXT IPM     | MDR | 1  | 0.2 |
| CIP NAL SXT IPM     | MDR | 1  | 0.2 |
| CIP GEN SXT IPM     | MDR | 1  | 0.2 |
| CTX TCY SXT IPM     | MDR | 1  | 0.2 |
| CTX NAL TCY SXT     | MDR | 1  | 0.2 |
| CTX CIP NAL TCY     | MDR | 1  | 0.2 |
| AMP TCY SXT IPM     | MDR | 17 | 3.7 |
| AMP GEN TCY SXT     | MDR | 1  | 0.2 |
| AMP CIP SXT IPM     | MDR | 1  | 0.2 |
| AMP CIP TCY SXT     | MDR | 3  | 0.7 |
| AMP CHL SXT IPM     | MDR | 2  | 0.4 |
| AMP CHL TCY SXT     | MDR | 1  | 0.2 |
| AMP CTX SXT IPM     | MDR | 1  | 0.2 |
| AMP CTX TCY SXT     | MDR | 2  | 0.4 |
| AMP CTX GEN TCY     | MDR | 1  | 0.2 |
| AMP CTX CIP IPM     | MDR | 4  | 0.9 |
| AMP CTX CIP TCY     | MDR | 1  | 0.2 |
| AMP CTX CIP GEN     | MDR | 1  | 0.2 |
| AMP CTX CHL SXT     | MDR | 1  | 0.2 |
| AMC AMP SXT IPM     | MDR | 4  | 0.9 |
| AMC AMP TCY SXT     | MDR | 6  | 1.3 |
| AMC AMP CIP SXT     | MDR | 1  | 0.2 |
| AMC AMP CHL SXT     | MDR | 1  | 0.2 |
| AMC AMP CTX IPM     | MDR | 2  | 0.4 |
| AMC AMP CTX SXT     | MDR | 5  | 1.1 |
| AMC AMP CTX TCY     | MDR | 2  | 0.4 |
| AMC AMP CTX CIP     | MDR | 2  | 0.4 |
| CIP NAL TCY SXT IPM | MDR | 1  | 0.2 |
| CIP GEN NAL TCY SXT | MDR | 1  | 0.2 |
| CTX CIP GEN SXT IPM | MDR | 1  | 0.2 |
| CTX CIP GEN TCY IPM | MDR | 1  | 0.2 |
| CTX CHL TCY SXT IPM | MDR | 1  | 0.2 |
| AMP GEN TCY SXT IPM | MDR | 2  | 0.4 |
| AMP CIP TCY SXT IPM | MDR | 2  | 0.4 |
| AMP CIP NAL TCY SXT | MDR | 2  | 0.4 |
| AMP CHL TCY SXT IPM | MDR | 6  | 1.3 |
| AMP CHL NAL TCY IPM | MDR | 1  | 0.2 |
| AMP CHL CIP SXT IPM | MDR | 2  | 0.4 |
| AMP CHL CIP TCY SXT | MDR | 1  | 0.2 |
| AMP CTX TCY SXT IPM | MDR | 2  | 0.4 |
| AMP CTX NAL SXT IPM | MDR | 1  | 0.2 |
| AMP CTX GEN TCY SXT | MDR | 1  | 0.2 |
| AMP CTX GEN NAL TCY | MDR | 1  | 0.2 |

|                             |     |    |     |
|-----------------------------|-----|----|-----|
| AMP CTX CIP NAL SXT         | MDR | 2  | 0.4 |
| AMC CTX TCY SXT IPM         | MDR | 1  | 0.2 |
| AMC CTX GEN SXT IPM         | MDR | 1  | 0.2 |
| AMC AMP TCY SXT IPM         | MDR | 11 | 2.4 |
| AMC AMP GEN SXT IPM         | MDR | 1  | 0.2 |
| AMC AMP CIP SXT IPM         | MDR | 1  | 0.2 |
| AMC AMP CHL SXT IPM         | MDR | 1  | 0.2 |
| AMC AMP CHL CIP SXT         | MDR | 1  | 0.2 |
| AMC AMP CTX SXT IPM         | MDR | 5  | 1.1 |
| AMC AMP CTX TCY IPM         | MDR | 1  | 0.2 |
| AMC AMP CTX TCY SXT         | MDR | 4  | 0.9 |
| AMC AMP CTX NAL IPM         | MDR | 1  | 0.2 |
| AMC AMP CTX GEN IPM         | MDR | 1  | 0.2 |
| AMC AMP CTX CIP IPM         | MDR | 3  | 0.7 |
| AMC AMP CTX CHL SXT         | MDR | 1  | 0.2 |
| CTX CIP GEN NAL SXT IPM     | MDR | 1  | 0.2 |
| AMP CIP NAL TCY SXT IPM     | MDR | 5  | 1.1 |
| AMP CIP GEN TCY SXT IPM     | MDR | 2  | 0.4 |
| AMP CIP GEN NAL TCY SXT     | MDR | 1  | 0.2 |
| AMP CHL NAL TCY SXT IPM     | MDR | 1  | 0.2 |
| AMP CHL GEN TCY SXT IPM     | MDR | 1  | 0.2 |
| AMP CHL CIP NAL TCY SXT     | MDR | 1  | 0.2 |
| AMP CTX NAL TCY SXT IPM     | MDR | 1  | 0.2 |
| AMP CTX CIP NAL TCY SXT     | MDR | 3  | 0.7 |
| AMP CTX CIP GEN TCY IPM     | MDR | 1  | 0.2 |
| AMP CTX CIP GEN TCY SXT     | MDR | 1  | 0.2 |
| AMP CTX CIP GEN NAL IPM     | MDR | 1  | 0.2 |
| AMP CTX CIP GEN NAL SXT     | MDR | 1  | 0.2 |
| AMP CTX CHL NAL TCY SXT     | MDR | 1  | 0.2 |
| AMP CTX CHL CIP GEN SXT     | MDR | 1  | 0.2 |
| AMC CHL CIP NAL TCY SXT     | MDR | 1  | 0.2 |
| AMC AMP GEN TCY SXT IPM     | MDR | 2  | 0.4 |
| AMC AMP GEN NAL SXT IPM     | MDR | 1  | 0.2 |
| AMC AMP CIP TCY SXT IPM     | MDR | 1  | 0.2 |
| AMC AMP CHL TCY SXT IPM     | MDR | 2  | 0.4 |
| AMC AMP CHL GEN TCY SXT     | MDR | 2  | 0.4 |
| AMC AMP CTX TCY SXT IPM     | MDR | 9  | 2.0 |
| AMC AMP CTX NAL SXT IPM     | MDR | 1  | 0.2 |
| AMC AMP CTX GEN SXT IPM     | MDR | 2  | 0.4 |
| AMC AMP CTX GEN TCY IPM     | MDR | 2  | 0.4 |
| AMC AMP CTX GEN TCY SXT     | MDR | 1  | 0.2 |
| AMC AMP CTX CIP SXT IPM     | MDR | 1  | 0.2 |
| AMC AMP CTX CIP TCY IPM     | MDR | 2  | 0.4 |
| AMC AMP CTX CIP TCY SXT     | MDR | 1  | 0.2 |
| AMC AMP CTX CIP NAL IPM     | MDR | 3  | 0.7 |
| AMC AMP CTX CIP GEN IPM     | MDR | 1  | 0.2 |
| AMC AMP CTX CIP GEN NAL     | MDR | 1  | 0.2 |
| AMC AMP CTX CHL TCY SXT     | MDR | 1  | 0.2 |
| AMP CIP GEN NAL TCY SXT IPM | MDR | 1  | 0.2 |
| AMP CHL GEN NAL TCY SXT IPM | MDR | 1  | 0.2 |

|                                         |     |                           |    |     |
|-----------------------------------------|-----|---------------------------|----|-----|
| AMP CHL CIP NAL TCY SXT IPM             | MDR |                           | 2  | 0.4 |
| AMP CTX GEN NAL TCY SXT IPM             | MDR |                           | 1  | 0.2 |
| AMP CTX CIP NAL TCY SXT IPM             | MDR |                           | 2  | 0.4 |
| AMP CTX CIP GEN NAL TCY IPM             | MDR |                           | 4  | 0.9 |
| AMP CTX CIP GEN NAL TCY SXT             | MDR |                           | 5  | 1.1 |
| AMP CTX CHL CIP GEN NAL IPM             | MDR |                           | 1  | 0.2 |
| AMC AMP CHL NAL TCY SXT IPM             | MDR |                           | 1  | 0.2 |
| AMC AMP CTX NAL TCY SXT IPM             | MDR |                           | 2  | 0.4 |
| AMC AMP CTX GEN NAL TCY SXT             | MDR |                           | 2  | 0.4 |
| AMC AMP CTX CIP NAL TCY IPM             | MDR |                           | 2  | 0.4 |
| AMC AMP CTX CIP NAL TCY SXT             | MDR |                           | 6  | 1.3 |
| AMC AMP CTX CIP GEN NAL SXT             | MDR |                           | 1  | 0.2 |
| AMC AMP CTX CIP GEN NAL TCY             | MDR |                           | 2  | 0.4 |
| CTX CHL GEN TCY SXT IPM                 | MDR | Possible XDR              | 1  | 0.2 |
| AMC CTX GEN TCY SXT IPM                 | MDR | Possible XDR              | 1  | 0.2 |
| AMP CTX CIP GEN TCY SXT IPM             | MDR | Possible XDR              | 1  | 0.2 |
| AMC AMP CHL GEN TCY SXT IPM             | MDR | Possible XDR              | 1  | 0.2 |
| AMC AMP CTX GEN TCY SXT IPM             | MDR | Possible XDR              | 2  | 0.4 |
| AMC AMP CTX CIP TCY SXT IPM             | MDR | Possible XDR              | 7  | 1.5 |
| AMC AMP CTX CIP GEN TCY IPM             | MDR | Possible XDR              | 1  | 0.2 |
| AMC AMP CTX CHL TCY SXT IPM             | MDR | Possible XDR              | 3  | 0.7 |
| AMP CTX CIP GEN NAL TCY SXT IPM         | MDR | Possible XDR              | 5  | 1.1 |
| AMP CTX CHL CIP NAL TCY SXT IPM         | MDR | Possible XDR              | 1  | 0.2 |
| AMP CTX CHL CIP GEN NAL TCY SXT         | MDR | Possible XDR              | 2  | 0.4 |
| AMC AMP CIP GEN NAL TCY SXT IPM         | MDR | Possible XDR              | 1  | 0.2 |
| AMC AMP CTX GEN NAL TCY SXT IPM         | MDR | Possible XDR              | 4  | 0.9 |
| AMC AMP CTX CIP NAL TCY SXT IPM         | MDR | Possible XDR              | 9  | 2.0 |
| AMC AMP CTX CIP GEN TCY SXT IPM         | MDR | Possible XDR              | 2  | 0.4 |
| AMC AMP CTX CIP GEN NAL SXT IPM         | MDR | Possible XDR              | 4  | 0.9 |
| AMC AMP CTX CIP GEN NAL TCY SXT         | MDR | Possible XDR              | 3  | 0.7 |
| AMC AMP CTX CHL NAL TCY SXT IPM         | MDR | Possible XDR              | 4  | 0.9 |
| AMC AMP CTX CHL GEN TCY SXT IPM         | MDR | Possible XDR              | 1  | 0.2 |
| AMC AMP CTX CHL CIP TCY SXT IPM         | MDR | Possible XDR              | 2  | 0.4 |
| AMC AMP CTX CHL CIP NAL SXT IPM         | MDR | Possible XDR              | 2  | 0.4 |
| AMP CTX CHL CIP GEN NAL TCY SXT IPM     | MDR | Possible XDR              | 2  | 0.4 |
| AMC AMP CTX CIP GEN NAL TCY SXT IPM     | MDR | Possible XDR              | 10 | 2.2 |
| AMC AMP CTX CHL GEN NAL TCY SXT IPM     | MDR | Possible XDR              | 1  | 0.2 |
| AMC AMP CTX CHL CIP NAL TCY SXT IPM     | MDR | Possible XDR              | 1  | 0.2 |
| AMC AMP CTX CHL CIP GEN NAL SXT IPM     | MDR | Possible XDR              | 1  | 0.2 |
| AMC AMP CTX CHL CIP GEN NAL TCY SXT     | MDR | Possible XDR              | 4  | 0.9 |
| AMC AMP CTX CHL CIP GEN TCY SXT IPM     | MDR | Possible XDR Possible PDR | 3  | 0.7 |
| AMC AMP CTX CHL CIP GEN NAL TCY SXT IPM | MDR | Possible XDR Possible PDR | 6  | 1.3 |
