# Supplementary material for: Evidence of Community-Wide Spread of Multi-Drug Resistant Escherichia coli in Young Children in Lusaka and Ndola Districts, Zambia
Source: MDPI journal article supplement (doi:10.3390/microorganisms10081684), 2022-08-21
Supplement: s1 [file s1]

# Supplementary 4. Antimicrobial resistant- E. coli patterns in diarrhoeic children

Diarrhoea (N= 565)

| Resistance patterns | MDR | XDR | PDR | N* of isolates | %Isolates |
|---------------------|-----|-----|-----|----------------|-----------|
|                     |     |     |     | 11             | 1.9       |
| IPM                 |     |     |     | 5              | 0.9       |
| SXT                 |     |     |     | 8              | 1.4       |
| TCY                 |     |     |     | 5              | 0.9       |
| NAL                 |     |     |     | 1              | 0.2       |
| CIP                 |     |     |     | 1              | 0.2       |
| CTX                 |     |     |     | 4              | 0.7       |
| AMP                 |     |     |     | 9              | 1.6       |
| AMC                 |     |     |     | 1              | 0.2       |
| TCY SXT             |     |     |     | 3              | 0.5       |
| GEN SXT             |     |     |     | 1              | 0.2       |
| CIP IPM             |     |     |     | 1              | 0.2       |
| CIP TCY             |     |     |     | 1              | 0.2       |
| CIP NAL             |     |     |     | 1              | 0.2       |
| CTX IPM             |     |     |     | 2              | 0.4       |
| CTX SXT             |     |     |     | 1              | 0.2       |
| CTX TCY             |     |     |     | 1              | 0.2       |
| AMP IPM             |     |     |     | 3              | 0.5       |
| AMP SXT             |     |     |     | 15             | 2.7       |
| AMP TCY             |     |     |     | 6              | 1.1       |
| AMP CIP             |     |     |     | 1              | 0.2       |
| AMP CHL             |     |     |     | 2              | 0.4       |
| AMP CTX             |     |     |     | 6              | 1.1       |
| AMC CIP             |     |     |     | 1              | 0.2       |
| CTX CIP NAL         |     |     |     | 4              | 0.7       |
| AMC CIP NAL         |     |     |     | 1              | 0.2       |
| CHL NAL TCY         | MDR |     |     | 1              | 0.2       |
| CTX NAL IPM         | MDR |     |     | 1              | 0.2       |
| CTX NAL TCY         | MDR |     |     | 2              | 0.4       |
| AMP SXT IPM         | MDR |     |     | 3              | 0.5       |
| AMP TCY IPM         | MDR |     |     | 2              | 0.4       |
| AMP TCY SXT         | MDR |     |     | 59             | 10.4      |
| AMP NAL SXT         | MDR |     |     | 3              | 0.5       |
| AMP NAL TCY         | MDR |     |     | 1              | 0.2       |
| AMP GEN SXT         | MDR |     |     | 1              | 0.2       |
| AMP CHL SXT         | MDR |     |     | 2              | 0.4       |
| AMP CTX SXT         | MDR |     |     | 8              | 1.4       |
| AMP CTX TCY         | MDR |     |     | 3              | 0.5       |
| AMP CTX NAL         | MDR |     |     | 3              | 0.5       |
| AMC AMP SXT         | MDR |     |     | 3              | 0.5       |
| AMC AMP TCY         | MDR |     |     | 1              | 0.2       |
| AMC AMP CTX         | MDR |     |     | 10             | 1.8       |
| AMP NAL TCY SXT     | MDR |     |     | 6              | 1.1       |

|                     |     |    |     |
|---------------------|-----|----|-----|
| AMP CIP NAL SXT     | MDR | 1  | 0.2 |
| AMP CIP NAL TCY     | MDR | 2  | 0.4 |
| AMP CHL NAL TCY     | MDR | 1  | 0.2 |
| AMP CTX NAL SXT     | MDR | 1  | 0.2 |
| AMP CTX CIP NAL     | MDR | 2  | 0.4 |
| AMC AMP NAL TCY     | MDR | 1  | 0.2 |
| TCY SXT IPM         | MDR | 3  | 0.5 |
| CIP TCY IPM         | MDR | 1  | 0.2 |
| AMC CTX CIP         | MDR | 2  | 0.4 |
| CIP TCY SXT IPM     | MDR | 1  | 0.2 |
| CIP NAL TCY IPM     | MDR | 1  | 0.2 |
| CIP NAL TCY SXT     | MDR | 1  | 0.2 |
| CIP GEN TCY IPM     | MDR | 1  | 0.2 |
| CTX NAL TCY SXT     | MDR | 2  | 0.4 |
| CTX CIP NAL IPM     | MDR | 2  | 0.4 |
| AMP TCY SXT IPM     | MDR | 13 | 2.3 |
| AMP GEN TCY SXT     | MDR | 1  | 0.2 |
| AMP CIP SXT IPM     | MDR | 1  | 0.2 |
| AMP CIP TCY SXT     | MDR | 7  | 1.2 |
| AMP CHL SXT IPM     | MDR | 2  | 0.4 |
| AMP CHL TCY IPM     | MDR | 1  | 0.2 |
| AMP CHL TCY SXT     | MDR | 3  | 0.5 |
| AMP CTX SXT IPM     | MDR | 2  | 0.4 |
| AMP CTX TCY IPM     | MDR | 1  | 0.2 |
| AMP CTX TCY SXT     | MDR | 33 | 5.8 |
| AMP CTX GEN IPM     | MDR | 1  | 0.2 |
| AMP CTX GEN TCY     | MDR | 1  | 0.2 |
| AMP CTX CIP TCY     | MDR | 2  | 0.4 |
| AMP CTX CIP GEN     | MDR | 1  | 0.2 |
| AMP CTX CHL SXT     | MDR | 1  | 0.2 |
| AMC CTX SXT IPM     | MDR | 1  | 0.2 |
| AMC AMP SXT IPM     | MDR | 1  | 0.2 |
| AMC AMP TCY IPM     | MDR | 1  | 0.2 |
| AMC AMP TCY SXT     | MDR | 10 | 1.8 |
| AMC AMP GEN TCY     | MDR | 1  | 0.2 |
| AMC AMP CIP SXT     | MDR | 2  | 0.4 |
| AMC AMP CHL SXT     | MDR | 1  | 0.2 |
| AMC AMP CTX IPM     | MDR | 1  | 0.2 |
| AMC AMP CTX SXT     | MDR | 6  | 1.1 |
| AMC AMP CTX TCY     | MDR | 2  | 0.4 |
| AMC AMP CTX CIP     | MDR | 2  | 0.4 |
| CIP NAL TCY SXT IPM | MDR | 1  | 0.2 |
| CTX NAL TCY SXT IPM | MDR | 1  | 0.2 |
| CTX GEN TCY SXT IPM | MDR | 1  | 0.2 |
| CTX CIP GEN SXT IPM | MDR | 1  | 0.2 |
| CTX CIP GEN NAL TCY | MDR | 1  | 0.2 |
| CTX CHL CIP NAL IPM | MDR | 1  | 0.2 |

|                         |     |    |     |
|-------------------------|-----|----|-----|
| AMP NAL TCY SXT IPM     | MDR | 2  | 0.4 |
| AMP GEN TCY SXT IPM     | MDR | 3  | 0.5 |
| AMP GEN NAL TCY SXT     | MDR | 2  | 0.4 |
| AMP CIP TCY SXT IPM     | MDR | 1  | 0.2 |
| AMP CIP NAL TCY IPM     | MDR | 1  | 0.2 |
| AMP CIP NAL TCY SXT     | MDR | 4  | 0.7 |
| AMP CHL NAL TCY SXT     | MDR | 5  | 0.9 |
| AMP CTX TCY SXT IPM     | MDR | 2  | 0.4 |
| AMP CTX NAL SXT IPM     | MDR | 1  | 0.2 |
| AMP CTX NAL TCY SXT     | MDR | 10 | 1.8 |
| AMP CTX CIP GEN SXT     | MDR | 1  | 0.2 |
| AMP CTX CIP GEN NAL     | MDR | 1  | 0.2 |
| AMP CTX CHL TCY SXT     | MDR | 3  | 0.5 |
| AMP CTX CHL NAL SXT     | MDR | 2  | 0.4 |
| AMP CTX CHL NAL TCY     | MDR | 1  | 0.2 |
| AMC CTX CIP TCY IPM     | MDR | 1  | 0.2 |
| AMC AMP TCY SXT IPM     | MDR | 3  | 0.5 |
| AMC AMP NAL TCY SXT     | MDR | 7  | 1.2 |
| AMC AMP CIP TCY SXT     | MDR | 3  | 0.5 |
| AMC AMP CIP NAL TCY     | MDR | 1  | 0.2 |
| AMC AMP CHL TCY SXT     | MDR | 4  | 0.7 |
| AMC AMP CHL NAL SXT     | MDR | 1  | 0.2 |
| AMC AMP CTX SXT IPM     | MDR | 4  | 0.7 |
| AMC AMP CTX TCY SXT     | MDR | 17 | 3.0 |
| AMC AMP CTX NAL IPM     | MDR | 1  | 0.2 |
| AMC AMP CTX NAL SXT     | MDR | 2  | 0.4 |
| AMC AMP CTX CIP SXT     | MDR | 1  | 0.2 |
| AMC AMP CTX CIP NAL     | MDR | 1  | 0.2 |
| CTX CIP GEN NAL TCY IPM | MDR | 1  | 0.2 |
| CTX CIP GEN NAL TCY SXT | MDR | 1  | 0.2 |
| AMP CIP NAL TCY SXT IPM | MDR | 1  | 0.2 |
| AMP CIP GEN NAL TCY SXT | MDR | 4  | 0.7 |
| AMP CHL GEN NAL SXT IPM | MDR | 1  | 0.2 |
| AMP CHL CIP NAL TCY SXT | MDR | 1  | 0.2 |
| AMP CTX NAL TCY SXT IPM | MDR | 2  | 0.4 |
| AMP CTX GEN NAL SXT IPM | MDR | 1  | 0.2 |
| AMP CTX CIP NAL TCY IPM | MDR | 1  | 0.2 |
| AMP CTX CIP NAL TCY SXT | MDR | 5  | 0.9 |
| AMP CTX CHL GEN NAL IPM | MDR | 1  | 0.2 |
| AMP CTX CHL CIP TCY SXT | MDR | 1  | 0.2 |
| AMC AMP CIP GEN NAL SXT | MDR | 2  | 0.4 |
| AMC AMP CHL TCY SXT IPM | MDR | 1  | 0.2 |
| AMC AMP CHL NAL TCY SXT | MDR | 1  | 0.2 |
| AMC AMP CHL CIP TCY SXT | MDR | 2  | 0.4 |
| AMC AMP CHL CIP NAL SXT | MDR | 1  | 0.2 |
| AMC AMP CTX TCY SXT IPM | MDR | 4  | 0.7 |
| AMC AMP CTX NAL SXT IPM | MDR | 1  | 0.2 |

|                                 |     |              |   |     |
|---------------------------------|-----|--------------|---|-----|
| AMC AMP CTX NAL TCY SXT         | MDR |              | 3 | 0.5 |
| AMC AMP CTX GEN SXT IPM         | MDR |              | 1 | 0.2 |
| AMC AMP CTX GEN TCY SXT         | MDR |              | 1 | 0.2 |
| AMC AMP CTX CIP TCY SXT         | MDR |              | 5 | 0.9 |
| AMC AMP CTX CIP NAL IPM         | MDR |              | 1 | 0.2 |
| AMC AMP CTX CIP NAL TCY         | MDR |              | 1 | 0.2 |
| AMC AMP CTX CIP GEN TCY         | MDR |              | 1 | 0.2 |
| AMC AMP CTX CIP GEN NAL         | MDR |              | 1 | 0.2 |
| AMC AMP CTX CHL TCY IPM         | MDR |              | 1 | 0.2 |
| AMC AMP CTX CHL TCY SXT         | MDR |              | 5 | 0.9 |
| AMC AMP CTX CHL CIP NAL         | MDR |              | 2 | 0.4 |
| AMP CTX CIP NAL TCY SXT IPM     | MDR |              | 3 | 0.5 |
| AMP CTX CIP GEN NAL TCY SXT     | MDR |              | 5 | 0.9 |
| AMP CTX CHL NAL TCY SXT IPM     | MDR |              | 2 | 0.4 |
| AMP CTX CHL GEN NAL TCY SXT     | MDR |              | 1 | 0.2 |
| AMP CTX CHL CIP NAL TCY SXT     | MDR |              | 3 | 0.5 |
| AMC AMP CIP NAL TCY SXT IPM     | MDR |              | 1 | 0.2 |
| AMC AMP CIP GEN NAL TCY SXT     | MDR |              | 1 | 0.2 |
| AMC AMP CHL NAL TCY SXT IPM     | MDR |              | 3 | 0.5 |
| AMC AMP CHL CIP NAL TCY SXT     | MDR |              | 1 | 0.2 |
| AMC AMP CTX NAL TCY SXT IPM     | MDR |              | 2 | 0.4 |
| AMC AMP CTX GEN NAL TCY IPM     | MDR |              | 1 | 0.2 |
| AMC AMP CTX GEN NAL TCY SXT     | MDR |              | 2 | 0.4 |
| AMC AMP CTX CIP NAL SXT IPM     | MDR |              | 1 | 0.2 |
| AMC AMP CTX CIP NAL TCY SXT     | MDR |              | 7 | 1.2 |
| AMC AMP CTX CHL NAL TCY SXT     | MDR |              | 2 | 0.4 |
| AMC AMP CTX CHL CIP NAL SXT     | MDR |              | 1 | 0.2 |
| CTX CIP GEN NAL TCY SXT IPM     | MDR | Possible XDR | 1 | 0.2 |
| CTX CHL CIP GEN NAL TCY IPM     | MDR | Possible XDR | 1 | 0.2 |
| AMP CHL CIP GEN TCY SXT IPM     | MDR | Possible XDR | 1 | 0.2 |
| AMP CTX CIP GEN TCY SXT IPM     | MDR | Possible XDR | 1 | 0.2 |
| AMP CTX CHL CIP GEN TCY SXT     | MDR | Possible XDR | 1 | 0.2 |
| AMC AMP CHL CIP TCY SXT IPM     | MDR | Possible XDR | 1 | 0.2 |
| AMC AMP CTX CIP TCY SXT IPM     | MDR | Possible XDR | 1 | 0.2 |
| AMC AMP CTX CIP GEN TCY SXT     | MDR | Possible XDR | 1 | 0.2 |
| AMC AMP CTX CHL GEN TCY SXT     | MDR | Possible XDR | 1 | 0.2 |
| AMC AMP CTX CHL CIP TCY SXT     | MDR | Possible XDR | 1 | 0.2 |
| AMP CTX CIP GEN NAL TCY SXT IPM | MDR | Possible XDR | 1 | 0.2 |
| AMC AMP CIP GEN NAL TCY SXT IPM | MDR | Possible XDR | 1 | 0.2 |
| AMC AMP CHL CIP NAL TCY SXT IPM | MDR | Possible XDR | 1 | 0.2 |
| AMC AMP CTX GEN NAL TCY SXT IPM | MDR | Possible XDR | 1 | 0.2 |
| AMC AMP CTX CIP NAL TCY SXT IPM | MDR | Possible XDR | 6 | 1.1 |
| AMC AMP CTX CIP GEN TCY SXT IPM | MDR | Possible XDR | 2 | 0.4 |
| AMC AMP CTX CIP GEN NAL SXT IPM | MDR | Possible XDR | 1 | 0.2 |
| AMC AMP CTX CIP GEN NAL TCY SXT | MDR | Possible XDR | 9 | 1.6 |
| AMC AMP CTX CHL NAL TCY SXT IPM | MDR | Possible XDR | 2 | 0.4 |
| AMC AMP CTX CHL CIP TCY SXT IPM | MDR | Possible XDR | 1 | 0.2 |

|                                     |     |              |    |     |
|-------------------------------------|-----|--------------|----|-----|
| AMC AMP CTX CHL CIP NAL SXT IPM     | MDR | Possible XDR | 1  | 0.2 |
| AMC AMP CTX CHL CIP NAL TCY IPM     | MDR | Possible XDR | 1  | 0.2 |
| AMC AMP CTX CHL CIP NAL TCY SXT     | MDR | Possible XDR | 2  | 0.4 |
| AMC AMP CTX CHL CIP GEN TCY SXT     | MDR | Possible XDR | 2  | 0.4 |
| AMC AMP CTX CHL CIP GEN NAL SXT     | MDR | Possible XDR | 1  | 0.2 |
| AMC AMP CTX CHL CIP GEN NAL TCY     | MDR | Possible XDR | 1  | 0.2 |
| AMP CTX CHL CIP GEN NAL TCY SXT IPM | MDR | Possible XDR | 1  | 0.2 |
| AMC AMP CTX CIP GEN NAL TCY SXT IPM | MDR | Possible XDR | 3  | 0.5 |
| AMC AMP CTX CHL CIP NAL TCY SXT IPM | MDR | Possible XDR | 1  | 0.2 |
| AMC AMP CTX CHL CIP GEN NAL SXT IPM | MDR | Possible XDR | 1  | 0.2 |
| AMC AMP CTX CHL CIP GEN NAL TCY SXT | MDR | Possible XDR | 11 | 1.9 |

---
