# Supplementary material for: Evidence of Community-Wide Spread of Multi-Drug Resistant Escherichia coli in Young Children in Lusaka and Ndola Districts, Zambia
Source: MDPI journal article supplement (doi:10.3390/microorganisms10081684), 2022-08-21
Supplement: s1 [file s1]

## Supplementary 2. Overall antimicrobial resistant- E. coli patterns

All (N=1020)

| Resistance patterns | MDR | XDR | PDR | N* of isolates | % Isolates |
|---------------------|-----|-----|-----|----------------|------------|
|                     |     |     |     | 32             | 3.1        |
| IPM                 |     |     |     | 14             | 1.4        |
| SXT                 |     |     |     | 9              | 0.9        |
| TCY                 |     |     |     | 9              | 0.9        |
| NAL                 |     |     |     | 1              | 0.1        |
| GEN                 |     |     |     | 2              | 0.2        |
| CIP                 |     |     |     | 2              | 0.2        |
| CTX                 |     |     |     | 8              | 0.8        |
| AMP                 |     |     |     | 9              | 0.9        |
| AMC                 |     |     |     | 1              | 0.1        |
| SXT IPM             |     |     |     | 6              | 0.6        |
| TCY IPM             |     |     |     | 2              | 0.2        |
| TCY SXT             |     |     |     | 6              | 0.6        |
| GEN IPM             |     |     |     | 3              | 0.3        |
| GEN SXT             |     |     |     | 1              | 0.1        |
| CIP IPM             |     |     |     | 2              | 0.2        |
| CIP TCY             |     |     |     | 1              | 0.1        |
| CIP NAL             |     |     |     | 2              | 0.2        |
| CTX IPM             |     |     |     | 6              | 0.6        |
| CTX SXT             |     |     |     | 1              | 0.1        |
| CTX TCY             |     |     |     | 1              | 0.1        |
| CTX NAL             |     |     |     | 1              | 0.1        |
| AMP IPM             |     |     |     | 9              | 0.9        |
| AMP SXT             |     |     |     | 19             | 1.9        |
| AMP TCY             |     |     |     | 7              | 0.7        |
| AMP CIP             |     |     |     | 1              | 0.1        |
| AMP CHL             |     |     |     | 2              | 0.2        |
| AMP CTX             |     |     |     | 8              | 0.8        |
| AMC IPM             |     |     |     | 3              | 0.3        |
| AMC CIP             |     |     |     | 1              | 0.1        |
| CTX CIP NAL         |     |     |     | 5              | 0.5        |
| AMC CIP NAL         |     |     |     | 1              | 0.1        |
| CHL NAL TCY         | MDR |     |     | 1              | 0.1        |
| CTX NAL IPM         | MDR |     |     | 1              | 0.1        |
| CTX NAL TCY         | MDR |     |     | 2              | 0.2        |
| CTX GEN NAL         | MDR |     |     | 1              | 0.1        |
| AMP SXT IPM         | MDR |     |     | 16             | 1.6        |
| AMP TCY IPM         | MDR |     |     | 6              | 0.6        |
| AMP TCY SXT         | MDR |     |     | 76             | 7.5        |
| AMP NAL SXT         | MDR |     |     | 3              | 0.3        |
| AMP NAL TCY         | MDR |     |     | 2              | 0.2        |
| AMP GEN SXT         | MDR |     |     | 2              | 0.2        |
| AMP CIP IPM         | MDR |     |     | 2              | 0.2        |
| AMP CIP SXT         | MDR |     |     | 1              | 0.1        |
| AMP CHL SXT         | MDR |     |     | 2              | 0.2        |
| AMP CTX IPM         | MDR |     |     | 1              | 0.1        |

|                 |     |    |     |
|-----------------|-----|----|-----|
| AMP CTX SXT     | MDR | 9  | 0.9 |
| AMP CTX TCY     | MDR | 3  | 0.3 |
| AMP CTX NAL     | MDR | 3  | 0.3 |
| AMP CTX CIP     | MDR | 1  | 0.1 |
| AMC AMP IPM     | MDR | 1  | 0.1 |
| AMC AMP SXT     | MDR | 6  | 0.6 |
| AMC AMP TCY     | MDR | 4  | 0.4 |
| AMC AMP CTX     | MDR | 15 | 1.5 |
| AMP NAL SXT IPM | MDR | 1  | 0.1 |
| AMP NAL TCY SXT | MDR | 7  | 0.7 |
| AMP CIP NAL SXT | MDR | 2  | 0.2 |
| AMP CIP NAL TCY | MDR | 2  | 0.2 |
| AMP CHL NAL TCY | MDR | 2  | 0.2 |
| AMP CTX NAL IPM | MDR | 1  | 0.1 |
| AMP CTX NAL SXT | MDR | 3  | 0.3 |
| AMP CTX NAL TCY | MDR | 1  | 0.1 |
| AMP CTX CIP NAL | MDR | 2  | 0.2 |
| AMC AMP NAL SXT | MDR | 1  | 0.1 |
| AMC AMP NAL TCY | MDR | 1  | 0.1 |
| TCY SXT IPM     | MDR | 6  | 0.6 |
| CIP TCY IPM     | MDR | 2  | 0.2 |
| CIP TCY SXT     | MDR | 1  | 0.1 |
| CTX SXT IPM     | MDR | 1  | 0.1 |
| CTX CIP IPM     | MDR | 1  | 0.1 |
| CTX CIP SXT     | MDR | 1  | 0.1 |
| CTX CIP TCY     | MDR | 1  | 0.1 |
| CTX CHL IPM     | MDR | 1  | 0.1 |
| AMC CTX CIP     | MDR | 2  | 0.2 |
| GEN TCY SXT IPM | MDR | 1  | 0.1 |
| CIP TCY SXT IPM | MDR | 2  | 0.2 |
| CIP NAL SXT IPM | MDR | 1  | 0.1 |
| CIP NAL TCY IPM | MDR | 1  | 0.1 |
| CIP NAL TCY SXT | MDR | 1  | 0.1 |
| CIP GEN SXT IPM | MDR | 1  | 0.1 |
| CIP GEN TCY IPM | MDR | 1  | 0.1 |
| CTX TCY SXT IPM | MDR | 1  | 0.1 |
| CTX NAL TCY SXT | MDR | 3  | 0.3 |
| CTX CIP NAL IPM | MDR | 2  | 0.2 |
| CTX CIP NAL TCY | MDR | 1  | 0.1 |
| AMP TCY SXT IPM | MDR | 30 | 2.9 |
| AMP GEN TCY SXT | MDR | 2  | 0.2 |
| AMP CIP SXT IPM | MDR | 2  | 0.2 |
| AMP CIP TCY SXT | MDR | 10 | 1.0 |
| AMP CHL SXT IPM | MDR | 4  | 0.4 |
| AMP CHL TCY IPM | MDR | 1  | 0.1 |
| AMP CHL TCY SXT | MDR | 4  | 0.4 |
| AMP CTX SXT IPM | MDR | 3  | 0.3 |
| AMP CTX TCY IPM | MDR | 1  | 0.1 |
| AMP CTX TCY SXT | MDR | 35 | 3.4 |
| AMP CTX GEN IPM | MDR | 1  | 0.1 |

|                     |     |    |     |
|---------------------|-----|----|-----|
| AMP CTX GEN TCY     | MDR | 2  | 0.2 |
| AMP CTX CIP IPM     | MDR | 4  | 0.4 |
| AMP CTX CIP TCY     | MDR | 3  | 0.3 |
| AMP CTX CIP GEN     | MDR | 2  | 0.2 |
| AMP CTX CHL SXT     | MDR | 2  | 0.2 |
| AMC CTX SXT IPM     | MDR | 1  | 0.1 |
| AMC AMP SXT IPM     | MDR | 5  | 0.5 |
| AMC AMP TCY IPM     | MDR | 1  | 0.1 |
| AMC AMP TCY SXT     | MDR | 16 | 1.6 |
| AMC AMP GEN TCY     | MDR | 1  | 0.1 |
| AMC AMP CIP SXT     | MDR | 3  | 0.3 |
| AMC AMP CHL SXT     | MDR | 2  | 0.2 |
| AMC AMP CTX IPM     | MDR | 3  | 0.3 |
| AMC AMP CTX SXT     | MDR | 11 | 1.1 |
| AMC AMP CTX TCY     | MDR | 4  | 0.4 |
| AMC AMP CTX CIP     | MDR | 4  | 0.4 |
| CIP NAL TCY SXT IPM | MDR | 2  | 0.2 |
| CIP GEN NAL TCY SXT | MDR | 1  | 0.1 |
| CTX NAL TCY SXT IPM | MDR | 1  | 0.1 |
| CTX GEN TCY SXT IPM | MDR | 1  | 0.1 |
| CTX CIP GEN SXT IPM | MDR | 2  | 0.2 |
| CTX CIP GEN TCY IPM | MDR | 1  | 0.1 |
| CTX CIP GEN NAL TCY | MDR | 1  | 0.1 |
| CTX CHL TCY SXT IPM | MDR | 1  | 0.1 |
| CTX CHL CIP NAL IPM | MDR | 1  | 0.1 |
| AMP NAL TCY SXT IPM | MDR | 2  | 0.2 |
| AMP GEN TCY SXT IPM | MDR | 5  | 0.5 |
| AMP GEN NAL TCY SXT | MDR | 2  | 0.2 |
| AMP CIP TCY SXT IPM | MDR | 3  | 0.3 |
| AMP CIP NAL TCY IPM | MDR | 1  | 0.1 |
| AMP CIP NAL TCY SXT | MDR | 6  | 0.6 |
| AMP CHL TCY SXT IPM | MDR | 6  | 0.6 |
| AMP CHL NAL TCY IPM | MDR | 1  | 0.1 |
| AMP CHL NAL TCY SXT | MDR | 5  | 0.5 |
| AMP CHL CIP SXT IPM | MDR | 2  | 0.2 |
| AMP CHL CIP TCY SXT | MDR | 1  | 0.1 |
| AMP CTX TCY SXT IPM | MDR | 4  | 0.4 |
| AMP CTX NAL SXT IPM | MDR | 2  | 0.2 |
| AMP CTX NAL TCY SXT | MDR | 10 | 1.0 |
| AMP CTX GEN TCY SXT | MDR | 1  | 0.1 |
| AMP CTX GEN NAL TCY | MDR | 1  | 0.1 |
| AMP CTX CIP NAL SXT | MDR | 2  | 0.2 |
| AMP CTX CIP GEN SXT | MDR | 1  | 0.1 |
| AMP CTX CIP GEN NAL | MDR | 1  | 0.1 |
| AMP CTX CHL TCY SXT | MDR | 3  | 0.3 |
| AMP CTX CHL NAL SXT | MDR | 2  | 0.2 |
| AMP CTX CHL NAL TCY | MDR | 1  | 0.1 |
| AMC CTX TCY SXT IPM | MDR | 1  | 0.1 |
| AMC CTX GEN SXT IPM | MDR | 1  | 0.1 |
| AMC CTX CIP TCY IPM | MDR | 1  | 0.1 |

|                         |     |    |     |
|-------------------------|-----|----|-----|
| AMC AMP TCY SXT IPM     | MDR | 14 | 1.4 |
| AMC AMP NAL TCY SXT     | MDR | 7  | 0.7 |
| AMC AMP GEN SXT IPM     | MDR | 1  | 0.1 |
| AMC AMP CIP SXT IPM     | MDR | 1  | 0.1 |
| AMC AMP CIP TCY SXT     | MDR | 3  | 0.3 |
| AMC AMP CIP NAL TCY     | MDR | 1  | 0.1 |
| AMC AMP CHL SXT IPM     | MDR | 1  | 0.1 |
| AMC AMP CHL TCY SXT     | MDR | 4  | 0.4 |
| AMC AMP CHL NAL SXT     | MDR | 1  | 0.1 |
| AMC AMP CHL CIP SXT     | MDR | 1  | 0.1 |
| AMC AMP CTX SXT IPM     | MDR | 9  | 0.9 |
| AMC AMP CTX TCY IPM     | MDR | 1  | 0.1 |
| AMC AMP CTX TCY SXT     | MDR | 21 | 2.1 |
| AMC AMP CTX NAL IPM     | MDR | 2  | 0.2 |
| AMC AMP CTX NAL SXT     | MDR | 2  | 0.2 |
| AMC AMP CTX GEN IPM     | MDR | 1  | 0.1 |
| AMC AMP CTX CIP IPM     | MDR | 3  | 0.3 |
| AMC AMP CTX CIP SXT     | MDR | 1  | 0.1 |
| AMC AMP CTX CIP NAL     | MDR | 1  | 0.1 |
| AMC AMP CTX CHL SXT     | MDR | 1  | 0.1 |
| CTX CIP GEN NAL SXT IPM | MDR | 1  | 0.1 |
| CTX CIP GEN NAL TCY IPM | MDR | 1  | 0.1 |
| CTX CIP GEN NAL TCY SXT | MDR | 1  | 0.1 |
| AMP CIP NAL TCY SXT IPM | MDR | 6  | 0.6 |
| AMP CIP GEN TCY SXT IPM | MDR | 2  | 0.2 |
| AMP CIP GEN NAL TCY SXT | MDR | 5  | 0.5 |
| AMP CHL NAL TCY SXT IPM | MDR | 1  | 0.1 |
| AMP CHL GEN TCY SXT IPM | MDR | 1  | 0.1 |
| AMP CHL GEN NAL SXT IPM | MDR | 1  | 0.1 |
| AMP CHL CIP NAL TCY SXT | MDR | 2  | 0.2 |
| AMP CTX NAL TCY SXT IPM | MDR | 3  | 0.3 |
| AMP CTX GEN NAL SXT IPM | MDR | 1  | 0.1 |
| AMP CTX CIP NAL TCY IPM | MDR | 1  | 0.1 |
| AMP CTX CIP NAL TCY SXT | MDR | 8  | 0.8 |
| AMP CTX CIP GEN TCY IPM | MDR | 1  | 0.1 |
| AMP CTX CIP GEN TCY SXT | MDR | 1  | 0.1 |
| AMP CTX CIP GEN NAL IPM | MDR | 1  | 0.1 |
| AMP CTX CIP GEN NAL SXT | MDR | 1  | 0.1 |
| AMP CTX CHL NAL TCY SXT | MDR | 1  | 0.1 |
| AMP CTX CHL GEN NAL IPM | MDR | 1  | 0.1 |
| AMP CTX CHL CIP TCY SXT | MDR | 1  | 0.1 |
| AMP CTX CHL CIP GEN SXT | MDR | 1  | 0.1 |
| AMC CHL CIP NAL TCY SXT | MDR | 1  | 0.1 |
| AMC AMP GEN TCY SXT IPM | MDR | 2  | 0.2 |
| AMC AMP GEN NAL SXT IPM | MDR | 1  | 0.1 |
| AMC AMP CIP TCY SXT IPM | MDR | 1  | 0.1 |
| AMC AMP CIP GEN NAL SXT | MDR | 2  | 0.2 |
| AMC AMP CHL TCY SXT IPM | MDR | 3  | 0.3 |
| AMC AMP CHL NAL TCY SXT | MDR | 1  | 0.1 |
| AMC AMP CHL GEN TCY SXT | MDR | 2  | 0.2 |

|                             |     |              |    |     |
|-----------------------------|-----|--------------|----|-----|
| AMC AMP CHL CIP TCY SXT     | MDR |              | 2  | 0.2 |
| AMC AMP CHL CIP NAL SXT     | MDR |              | 1  | 0.1 |
| AMC AMP CTX TCY SXT IPM     | MDR |              | 13 | 1.3 |
| AMC AMP CTX NAL SXT IPM     | MDR |              | 2  | 0.2 |
| AMC AMP CTX NAL TCY SXT     | MDR |              | 3  | 0.3 |
| AMC AMP CTX GEN SXT IPM     | MDR |              | 3  | 0.3 |
| AMC AMP CTX GEN TCY IPM     | MDR |              | 2  | 0.2 |
| AMC AMP CTX GEN TCY SXT     | MDR |              | 2  | 0.2 |
| AMC AMP CTX CIP SXT IPM     | MDR |              | 1  | 0.1 |
| AMC AMP CTX CIP TCY IPM     | MDR |              | 2  | 0.2 |
| AMC AMP CTX CIP TCY SXT     | MDR |              | 6  | 0.6 |
| AMC AMP CTX CIP NAL IPM     | MDR |              | 4  | 0.4 |
| AMC AMP CTX CIP NAL TCY     | MDR |              | 1  | 0.1 |
| AMC AMP CTX CIP GEN IPM     | MDR |              | 1  | 0.1 |
| AMC AMP CTX CIP GEN TCY     | MDR |              | 1  | 0.1 |
| AMC AMP CTX CIP GEN NAL     | MDR |              | 2  | 0.2 |
| AMC AMP CTX CHL TCY IPM     | MDR |              | 1  | 0.1 |
| AMC AMP CTX CHL TCY SXT     | MDR |              | 6  | 0.6 |
| AMC AMP CTX CHL CIP NAL     | MDR |              | 2  | 0.2 |
| AMP CIP GEN NAL TCY SXT IPM | MDR |              | 1  | 0.1 |
| AMP CHL GEN NAL TCY SXT IPM | MDR |              | 1  | 0.1 |
| AMP CHL CIP NAL TCY SXT IPM | MDR |              | 2  | 0.2 |
| AMP CTX GEN NAL TCY SXT IPM | MDR |              | 1  | 0.1 |
| AMP CTX CIP NAL TCY SXT IPM | MDR |              | 5  | 0.5 |
| AMP CTX CIP GEN NAL TCY IPM | MDR |              | 4  | 0.4 |
| AMP CTX CIP GEN NAL TCY SXT | MDR |              | 10 | 1.0 |
| AMP CTX CHL NAL TCY SXT IPM | MDR |              | 2  | 0.2 |
| AMP CTX CHL GEN NAL TCY SXT | MDR |              | 1  | 0.1 |
| AMP CTX CHL CIP NAL TCY SXT | MDR |              | 3  | 0.3 |
| AMP CTX CHL CIP GEN NAL IPM | MDR |              | 1  | 0.1 |
| AMC AMP CIP NAL TCY SXT IPM | MDR |              | 1  | 0.1 |
| AMC AMP CIP GEN NAL TCY SXT | MDR |              | 1  | 0.1 |
| AMC AMP CHL NAL TCY SXT IPM | MDR |              | 4  | 0.4 |
| AMC AMP CHL CIP NAL TCY SXT | MDR |              | 1  | 0.1 |
| AMC AMP CTX NAL TCY SXT IPM | MDR |              | 4  | 0.4 |
| AMC AMP CTX GEN NAL TCY IPM | MDR |              | 1  | 0.1 |
| AMC AMP CTX GEN NAL TCY SXT | MDR |              | 4  | 0.4 |
| AMC AMP CTX CIP NAL SXT IPM | MDR |              | 1  | 0.1 |
| AMC AMP CTX CIP NAL TCY IPM | MDR |              | 2  | 0.2 |
| AMC AMP CTX CIP NAL TCY SXT | MDR |              | 13 | 1.3 |
| AMC AMP CTX CIP GEN NAL SXT | MDR |              | 1  | 0.1 |
| AMC AMP CTX CIP GEN NAL TCY | MDR |              | 2  | 0.2 |
| AMC AMP CTX CHL NAL TCY SXT | MDR |              | 2  | 0.2 |
| AMC AMP CTX CHL CIP NAL SXT | MDR |              | 1  | 0.1 |
| CTX CHL GEN TCY SXT IPM     | MDR | Possible XDR | 1  | 0.1 |
| AMC CTX GEN TCY SXT IPM     | MDR | Possible XDR | 1  | 0.1 |
| CTX CIP GEN NAL TCY SXT IPM | MDR | Possible XDR | 1  | 0.1 |
| CTX CHL CIP GEN NAL TCY IPM | MDR | Possible XDR | 1  | 0.1 |
| AMP CHL CIP GEN TCY SXT IPM | MDR | Possible XDR | 1  | 0.1 |
| AMP CTX CIP GEN TCY SXT IPM | MDR | Possible XDR | 2  | 0.2 |

|                                         |     |                           |    |     |
|-----------------------------------------|-----|---------------------------|----|-----|
| AMP CTX CHL CIP GEN TCY SXT             | MDR | Possible XDR              | 1  | 0.1 |
| AMC AMP CHL GEN TCY SXT IPM             | MDR | Possible XDR              | 1  | 0.1 |
| AMC AMP CHL CIP TCY SXT IPM             | MDR | Possible XDR              | 1  | 0.1 |
| AMC AMP CTX GEN TCY SXT IPM             | MDR | Possible XDR              | 2  | 0.2 |
| AMC AMP CTX CIP TCY SXT IPM             | MDR | Possible XDR              | 8  | 0.8 |
| AMC AMP CTX CIP GEN TCY IPM             | MDR | Possible XDR              | 1  | 0.1 |
| AMC AMP CTX CIP GEN TCY SXT             | MDR | Possible XDR              | 1  | 0.1 |
| AMC AMP CTX CHL TCY SXT IPM             | MDR | Possible XDR              | 3  | 0.3 |
| AMC AMP CTX CHL GEN TCY SXT             | MDR | Possible XDR              | 1  | 0.1 |
| AMC AMP CTX CHL CIP TCY SXT             | MDR | Possible XDR              | 1  | 0.1 |
| AMP CTX CIP GEN NAL TCY SXT IPM         | MDR | Possible XDR              | 6  | 0.6 |
| AMP CTX CHL CIP NAL TCY SXT IPM         | MDR | Possible XDR              | 1  | 0.1 |
| AMP CTX CHL CIP GEN NAL TCY SXT         | MDR | Possible XDR              | 2  | 0.2 |
| AMC AMP CIP GEN NAL TCY SXT IPM         | MDR | Possible XDR              | 2  | 0.2 |
| AMC AMP CHL CIP NAL TCY SXT IPM         | MDR | Possible XDR              | 1  | 0.1 |
| AMC AMP CTX GEN NAL TCY SXT IPM         | MDR | Possible XDR              | 5  | 0.5 |
| AMC AMP CTX CIP NAL TCY SXT IPM         | MDR | Possible XDR              | 15 | 1.5 |
| AMC AMP CTX CIP GEN TCY SXT IPM         | MDR | Possible XDR              | 4  | 0.4 |
| AMC AMP CTX CIP GEN NAL SXT IPM         | MDR | Possible XDR              | 5  | 0.5 |
| AMC AMP CTX CIP GEN NAL TCY SXT         | MDR | Possible XDR              | 12 | 1.2 |
| AMC AMP CTX CHL NAL TCY SXT IPM         | MDR | Possible XDR              | 6  | 0.6 |
| AMC AMP CTX CHL GEN TCY SXT IPM         | MDR | Possible XDR              | 1  | 0.1 |
| AMC AMP CTX CHL CIP TCY SXT IPM         | MDR | Possible XDR              | 3  | 0.3 |
| AMC AMP CTX CHL CIP NAL SXT IPM         | MDR | Possible XDR              | 3  | 0.3 |
| AMC AMP CTX CHL CIP NAL TCY IPM         | MDR | Possible XDR              | 1  | 0.1 |
| AMC AMP CTX CHL CIP NAL TCY SXT         | MDR | Possible XDR              | 2  | 0.2 |
| AMC AMP CTX CHL CIP GEN TCY SXT         | MDR | Possible XDR              | 2  | 0.2 |
| AMC AMP CTX CHL CIP GEN NAL SXT         | MDR | Possible XDR              | 1  | 0.1 |
| AMC AMP CTX CHL CIP GEN NAL TCY         | MDR | Possible XDR              | 1  | 0.1 |
| AMP CTX CHL CIP GEN NAL TCY SXT IPM     | MDR | Possible XDR              | 3  | 0.3 |
| AMC AMP CTX CIP GEN NAL TCY SXT IPM     | MDR | Possible XDR              | 13 | 1.3 |
| AMC AMP CTX CHL GEN NAL TCY SXT IPM     | MDR | Possible XDR              | 1  | 0.1 |
| AMC AMP CTX CHL CIP NAL TCY SXT IPM     | MDR | Possible XDR              | 2  | 0.2 |
| AMC AMP CTX CHL CIP GEN NAL SXT IPM     | MDR | Possible XDR              | 2  | 0.2 |
| AMC AMP CTX CHL CIP GEN NAL TCY SXT     | MDR | Possible XDR              | 15 | 1.5 |
| AMC AMP CTX CHL CIP GEN TCY SXT IPM     | MDR | Possible XDR Possible PDR | 3  | 0.3 |
| AMC AMP CTX CHL CIP GEN NAL TCY SXT IPM | MDR | Possible XDR Possible PDR | 6  | 0.6 |
